# Supplementary material for: Synthesis and biological evaluation of new 2,5-dimethylthiophene/furan based N-acetyl pyrazolines as selective topoisomerase II inhibitors
Source: Royal Society of Chemistry journal article supplement (doi:10.1039/c5ra25705k), 2016-01-01

## Supporting information

### Synthesis and biological evaluation of new 2, 5 dimethylthiophene/furan based *N*-acetyl pyrazolines as selective topoisomerase II inhibitors

Darpan,<sup>a,b</sup> Gaurav Joshi,<sup>a</sup> Suyog M. Amrutkar,<sup>c</sup> Ashish T. Baviskar,<sup>c</sup> Harveen Kler,<sup>a</sup> Sandeep Singh,<sup>d</sup> Uttam C. Banerjee,<sup>c</sup> Raj Kumar<sup>\*a,b</sup>

<sup>a</sup>Laboratory for Drug Design and Synthesis, Centre for Pharmaceutical Sciences and Natural Products, Central University of Punjab, 151 001, Bathinda, India; [E-mail: raj.khunger@gmail.com](mailto:raj.khunger@gmail.com); [rajcps@cup.ac.in](mailto:rajcps@cup.ac.in);

Tel: +91-0164-2864215; fax: +91-1636-236564

<sup>b</sup>Indo-Soviet Friendship College of Pharmacy, Moga, 141001, Punjab, India

<sup>c</sup>Department of Pharmaceutical Technology (Biotechnology), National Institute of Pharmaceutical Education and Research (NIPER), Mohali, S. A. S. Nagar, Sec 67, 160 062, Punjab, India

<sup>d</sup>Centre for Human Genetics and Molecular Medicine, Central University of Punjab, 151 001, Bathinda, India

#### Compound 11 (<sup>1</sup>H NMR)

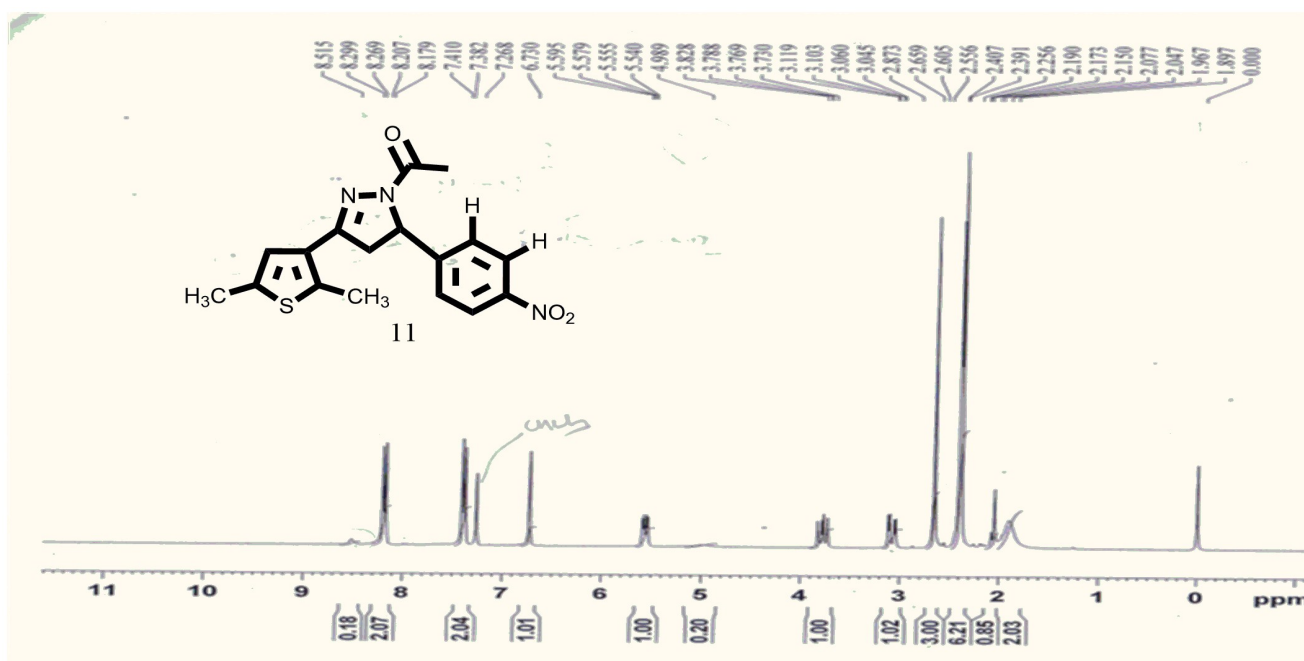

Compound 29 (<sup>1</sup>H NMR)

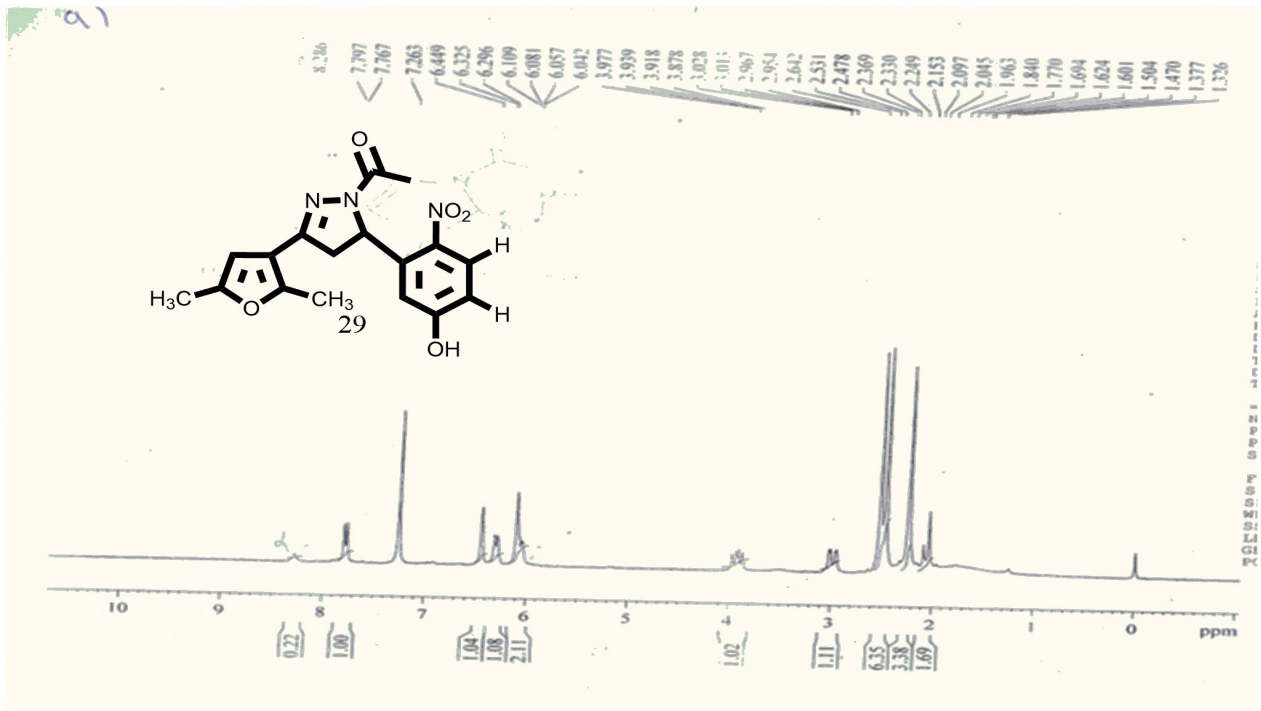

Supplement: c5ra25705k1.pdf [file c5ra25705k1.pdf]
